# Supplementary material for: Reversible tuning of luminescence and magnetism in a structurally flexible erbium–anilato MOF
Source: PubMed Central journal article supplement — Chem Sci. 2022 May 10;13(25):7419–28. doi: 10.1039/d2sc00769j (PMC9242018; doi:10.1039/d2sc00769j), 2022-05-10
Supplement: SC-013-D2SC00769J-s001.pdf [file SC-013-D2SC00769J-s001.pdf]

## Reversible Tuning of Luminescence and Magnetism in a Structurally Flexible Erbium-Anilato MOF

Noemi Monni,<sup>a,b,d</sup> José J. Baldoví,<sup>b</sup> Victor Garcia-Lopez,<sup>b</sup> Mariangela Oggianu,<sup>a,d</sup> Enzo Cadoni,<sup>a</sup> Francesco Quochi,<sup>\*c,d</sup> Miguel Clemente-León,<sup>\*b</sup> Maria Laura Mercuri<sup>\*a,d</sup> and Eugenio Coronado<sup>b</sup>

<sup>a</sup>Dipartimento di Scienze Chimiche e Geologiche, Università degli Studi di Cagliari, Complesso Universitario di Monserrato, 09042 Monserrato, Italy.

<sup>b</sup>Instituto de Ciencia Molecular, Universitat de València, Catedrático José Beltrán 2, 46980 Paterna, Spain.

<sup>c</sup>Dipartimento di Fisica, Università degli Studi di Cagliari, Complesso Universitario di Monserrato, 09042 Monserrato, Italy

<sup>d</sup>INSTM, Via Giusti, 9 50121 Firenze, Italy

### Supporting Informations

#### Index

1. Synthesis and Physical Measurements
2. X-Ray Diffraction
3. FT-IR Spectroscopy
4. Thermogravimetric Analysis
5. Magnetic Measurements
6. Theoretical Calculations
7. Photoluminescence Measurements
8. References

## 1. Synthesis and Physical Measurements

GENERAL REMARKS. The Ln precursors, NaOH in pellets and the solvents used were purchased from Alfa Aesar and Exacta Optech and used without further purification. Synthesis of ligand  $H_2trz_2An$  was performed according with literature.<sup>1</sup> Elemental analyses (C, H, and N) were performed with a CE Instruments EA 1110 CHNS.

SYNTHESIS.  $[Er_2(trz_2An)_3(H_2O)_4]_n \cdot 10H_2O$  (**1a**) and  $[Er_2(trz_2An)_3(H_2O)_4]_n \cdot 7H_2O$  (**1b**). A 5 mL Teflon vial with a mixture of  $Er(NO_3)_3 \cdot 6H_2O$  (0.05 mmol; 22.2 mg),  $H_2trz_2An$  (0.05 mmol, 13.7 mg), NaOH (0.1 mmol, 4 mg) and water (5 mL) was heated at 130°C for 48 hours and then the vial was slowly cooled to room temperature. Two different types of crystals were obtained from the same batch, dark red-block crystals (**phase a**) and orange prismatic crystals (**phase b**), both of them were suitable for SC-XRD measurements. Their density's difference was exploited to separate them, using  $CH_2Cl_2/CH_2Br_2$  solvent mixture in the ratio 0.925/0.975, for all further measurements. Elemental analysis of **1a** and **1b** is reported below in **Table 1**. Both single crystals and polycrystalline powder of **1a** were placed under vacuum in a vacuum line pump and then sealed in a glove box to obtain  $[Er_2(trz_2An)_3(H_2O)_2]_n \cdot 2H_2O$  (**1a\_des**), whereas the same attempt on **1b** produced no changes. Elemental analysis of **1a\_des** is not shown since it turns to the structure of **1a** after two days in air (see below).

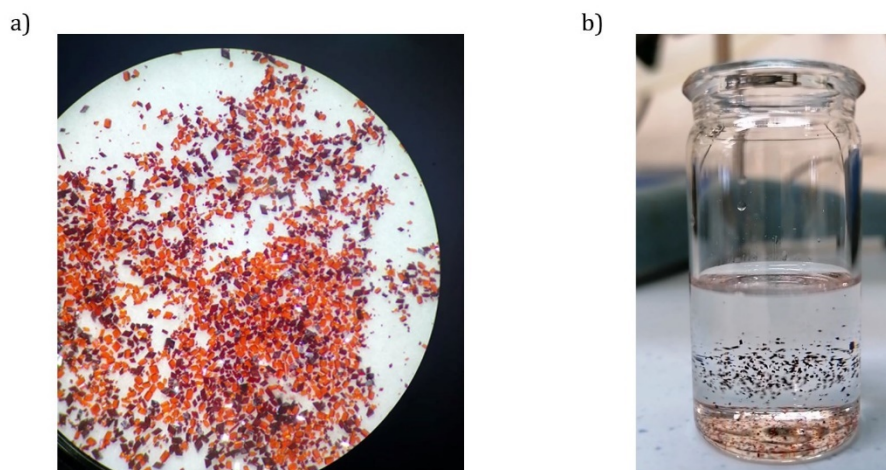

**Figure S1.** a) Optical microscope image of a mixture of crystals of phase **a** and **b**; b) crystals separations using the  $CH_2Cl_2/CH_2Br_2$  solution mix.

**Table S1.** Elemental analysis for all the compounds **1a** and **1b**.

|    |                                                                                 | Calculated |      |       | Found |      |       |
|----|---------------------------------------------------------------------------------|------------|------|-------|-------|------|-------|
|    |                                                                                 | %C         | %H   | %N    | %C    | %H   | %N    |
| 1a | C <sub>30</sub> H <sub>40</sub> N <sub>18</sub> O <sub>26</sub> Er <sub>2</sub> | 25.68      | 2.87 | 17.97 | 25.37 | 2.81 | 17.86 |
| 1b | C <sub>30</sub> H <sub>34</sub> N <sub>18</sub> O <sub>23</sub> Er <sub>2</sub> | 26.71      | 2.54 | 18.69 | 26.70 | 2.24 | 18.57 |

#### PHYSICAL MEASUREMENTS.

A detailed description of **X-Ray Diffraction** experimental setup and additional data is provided in *paragraph 2*.

**Thermogravimetric Analysis.** Thermogravimetric analyses were performed in alumina crucibles with the instrument STA-6000 under nitrogen flux (40 mL/min), in the 25-800°C temperature range at 10°C/min.

**Magnetic Measurements.** Magnetic measurements were performed with Quantum Design MPMS-XL-5 SQUID and PPMS-9 magnetometers on powdered polycrystalline samples measured with eicosane to avoid preferential orientations. In the case of **1a**, it was necessary to protect the sample covering it with H<sub>2</sub>O in a glass tube since the vacuum of the squid chamber caused desolvation and the formation of **1a\_des**. Thus, magnetic measurements of **1a** in the absence of H<sub>2</sub>O correspond to **1a\_des**.

**Theoretical Calculations.** For the theoretical modelling of the magnetic properties, we have used the SIMPRE computational package,<sup>2</sup> introducing the crystallographic atomic coordinates and the experimental magnetic properties of the compounds as an input. In order to fit the experimental data, we have varied the two parameters ( $D_r$  and  $Z_i$ ) of the REC model for each type of donor atom of the first coordination sphere.<sup>3</sup> A detailed explanation is provided in *paragraph 6*.

**Photoluminescence Measurements.** Photoluminescence (PL) experiments were performed with pulsed laser irradiance at 355 nm wavelength. Finely ground powders were compacted between quartz slides for measurements in standard conditions, or attached to the cold finger of a continuous-flow cryostat (Janis ST-500) for measurements under controlled atmosphere (air, vacuum, N<sub>2</sub>), fed with liquid N<sub>2</sub> for low-temperature measurements under vacuum conditions at

77K. For time-resolved measurements of the ligand-centered emissions, samples were excited by optical parametric amplifier (Light Conversion TOPAS-C) emitting ~200-fs-long pulses at the repetition frequency of 1 kHz and detected by a Vis streak camera (Hamamatsu C1091) connected to a single-grating spectrometer (Princeton Instruments Acton SpectraPro2300i). For all other PL experiments, samples were pumped by a passively Q-switched powerchip laser (Teem Photonics PNV-M02510) delivering ~350 ps pulses, centered at 355 nm wavelength, at 1 kHz. The PL signals were analyzed by a single-grating spectrometer (Princeton Instruments Acton SpectraPro 2300i) and acquired by thermoelectrically cooled detectors, namely, (a) a Vis CCD camera (Andor NewtonEM) for ligand-centered emission spectra, (b) a NIR array detector (Andor iDus InGaAs 1.7mm) for NIR PL spectra, and (c) a photomultiplier (Hamamatsu H10330A-75) connected to a 1 GHz digital oscilloscope (Tektronix TDS 5104) for NIR PL decay transients.

## 2. X-Ray Diffraction

Single crystal X-Ray diffraction was performed on **1a** and **1b** crystals, which were mounted on a glass fiber using a viscous hydrocarbon oil to coat the single crystal and then transferred directly to the cold nitrogen stream for data collection. X ray data were collected at 120 K for both samples. Furthermore, a single crystal of **1a** was measured at 360 K (**1a\_des** 360 K) and another one was measured at 120 K after being placed in vacuum under a vacuum line pump and were then opened in the glove box to be sealed and mounted on a glass fiber using a viscous hydrocarbon oil to coat the single crystal. Then, the sample was transferred to the cold nitrogen stream for data collection (**1a\_des** vacuum). Measurements were performed on a Supernova diffractometer equipped with a graphite-monochromated Enhance (Mo) X-ray Source ( $\lambda = 0.71073 \text{ \AA}$ ). The program CrysAlisPro, Oxford Diffraction Ltd., was used for unit cell determinations and data reduction. Empirical absorption correction was performed using spherical harmonics, implemented in the SCALE3 ABSPACK scaling algorithm. The structures were solved with the ShelXT structure solution program<sup>4</sup> and refined with the SHELXL-2013 program,<sup>5</sup> using Olex2.<sup>6</sup> Non-hydrogen atoms were refined anisotropically, and hydrogen atoms were placed in calculated positions refined using idealized geometries (riding model) and assigned fixed isotropic displacement parameters. Single crystal diffraction data of **1a\_des** are of very bad quality due to the loss of single crystallinity under vacuum or temperatures above 350 K but good enough to solve the structure. Dehydration caused structural damage of part of the crystal, which could be responsible of several A and B errors in the checkcif files. Crystallographic data of all the compounds are summarized in **Table S2**. Crystallographic data for the structures was deposited in the Cambridge Crystallographic Data Centre, deposition numbers CCDC 2130639-42. These data can be obtained

free of charge from The Cambridge Crystallographic Data Centre via [www.ccdc.cam.ac.uk/data\\_request/cif](http://www.ccdc.cam.ac.uk/data_request/cif).

Powder X-ray diffraction (PXRD) patterns were performed using a 0.7 mm glass capillary filled with polycrystalline samples of the compounds and mounted and aligned on an Empyrean PANalytical powder diffractometer, using Cu K $\alpha$  radiation ( $\lambda = 1.541\ 77\ \text{\AA}$ ). A total of three scans were collected for each compound at room temperature in the  $2\theta$  range of  $5\text{--}40^\circ$ . Polycrystalline samples of **1a** and **1b** were further placed under vacuum in a vacuum line pump and were then opened in the glove box to be sealed in the 0.7 mm glass capillary.

**Table S2.** Crystallographic data for compound **1a**, **1a\_des** and **1b**.

|                                            | <b>1a</b>                                                                       | <b>1a_des (360 K)</b>                                                           | <b>1a_des (vacuum)</b>                                                          | <b>1b</b>                                                                       |
|--------------------------------------------|---------------------------------------------------------------------------------|---------------------------------------------------------------------------------|---------------------------------------------------------------------------------|---------------------------------------------------------------------------------|
| Empirical formula                          | C <sub>30</sub> H <sub>28</sub> N <sub>18</sub> O <sub>25</sub> Er <sub>2</sub> | C <sub>30</sub> H <sub>16</sub> N <sub>18</sub> O <sub>15</sub> Er <sub>2</sub> | C <sub>30</sub> H <sub>14</sub> N <sub>18</sub> O <sub>18</sub> Er <sub>2</sub> | C <sub>30</sub> H <sub>28</sub> N <sub>18</sub> O <sub>20</sub> Er <sub>2</sub> |
| FW                                         | 1.375.22                                                                        | 1203.12                                                                         | 1249.12                                                                         | 1295.22                                                                         |
| Crystal color                              | Dark Purple                                                                     | Purple                                                                          | Purple                                                                          | Orange                                                                          |
| Crystal size (mm <sup>3</sup> )            | 0.24 × 0.15 × 0.07                                                              | 0.19 × 0.18 × 0.11                                                              | 0.29 × 0.24 × 0.12                                                              | 0.24 × 0.15 × 0.13                                                              |
| Temperature (K)                            | 120                                                                             | 360                                                                             | 120                                                                             | 120                                                                             |
| Wavelength (Å)                             | (MoK $\alpha$ ) $\lambda = 0.71073$                                             |
| Crystal system                             | triclinic                                                                       | triclinic                                                                       | triclinic                                                                       | triclinic                                                                       |
| Space group                                | <i>P</i> -1                                                                     | <i>P</i> -1                                                                     | <i>P</i> -1                                                                     | <i>P</i> -1                                                                     |
| a (Å)                                      | 8.9555 (7)                                                                      | 9.0051 (13)                                                                     | 9.013(3)                                                                        | 8.6201(3)                                                                       |
| b (Å)                                      | 9.4191 (7)                                                                      | 9.3427 (17)                                                                     | 9.200(3)                                                                        | 10.4220 (4)                                                                     |
| c (Å)                                      | 15.4553 (12)                                                                    | 12.533 (2)                                                                      | 12.495(3)                                                                       | 11.9887(4)                                                                      |
| a (°)                                      | 75.154 (7)                                                                      | 93.979 (15)                                                                     | 94.90(2)                                                                        | 80.139(3)                                                                       |
| b (°)                                      | 77.176 (7)                                                                      | 97.759 (14)                                                                     | 98.10(2)                                                                        | 79.145(3)                                                                       |
| g (°)                                      | 67.936 (7)                                                                      | 115.991 (16)                                                                    | 115.67(3)                                                                       | 82.373(3)                                                                       |
| V (Å <sup>3</sup> )                        | 1156.33 (17)                                                                    | 929.3 (3)                                                                       | 912.1(5)                                                                        | 1036.52(7)                                                                      |
| $\rho_{\text{calc}}$ (g.cm <sup>-3</sup> ) | 1.975                                                                           | 2.150                                                                           | 2.274                                                                           | 2.075                                                                           |
| $\mu$ (MoK $\alpha$ ) (mm <sup>-1</sup> )  | 3.712                                                                           | 4.584                                                                           | 4.681                                                                           | 4.126                                                                           |
| 2 $\theta$ range (°)                       | 5.59 to 55.74                                                                   | 6.078 to 52.78                                                                  | 6.15 to 56.152                                                                  | 6.584 to 56.08                                                                  |
| Index ranges                               | -11 ≤ h ≤ 11, -11 ≤ k ≤ 12,<br>-17 ≤ l ≤ 20                                     | -10 ≤ h ≤ 11,<br>-11 ≤ k ≤ 11,<br>-15 ≤ l ≤ 15                                  | -11 ≤ h ≤ 11,<br>-12 ≤ k ≤ 11,<br>-15 ≤ l ≤ 16                                  | -11 ≤ h ≤ 11,<br>-13 ≤ k ≤ 12,<br>-15 ≤ l ≤ 14                                  |
| Reflections collected                      | 7799                                                                            | 9454                                                                            | 10668                                                                           | 14194                                                                           |
| Independent reflections                    | 4608 [R <sub>int</sub> = 0.0362,<br>R <sub>sigma</sub> = 0.0667]                | 3640 [R <sub>int</sub> = 0.1450,<br>R <sub>sigma</sub> = 0.1500]                | 3881 [R <sub>int</sub> = 0.1745,<br>R <sub>sigma</sub> = 0.2099]                | 4366 [R <sub>int</sub> = 0.0203,<br>R <sub>sigma</sub> = 0.0223]                |
| Data/restraints/parameters                 | 4608/0/339                                                                      | 3640/0/270                                                                      | 3881/2/272                                                                      | 4366/0/324                                                                      |
| Goodness-of-fit on F2                      | 1.046                                                                           | 1.111                                                                           | 1.090                                                                           | 1.055                                                                           |
| Final R indexes [I ≥ 2 $\sigma$ (I)]       | R <sub>1</sub> = 0.0354, wR <sub>2</sub> =<br>0.0680                            | R <sub>1</sub> =0.1222, wR <sub>2</sub> =0.2922                                 | R <sub>1</sub> =0.1400, wR <sub>2</sub> =0.298<br>6                             | R <sub>1</sub> =0.0155, wR <sub>2</sub> =0.037<br>0                             |
| Final R indexes [all data]                 | R <sub>1</sub> = 0.0414, wR <sub>2</sub> =<br>0.0735                            | R <sub>1</sub> =0.1678, wR <sub>2</sub> =<br>0.3317                             | R <sub>1</sub> =0.2072, wR <sub>2</sub> =0.361<br>3                             | R <sub>1</sub> =0.0162, wR <sub>2</sub> =0.037<br>3                             |
| Largest diff. peak/hole/e Å <sup>-3</sup>  | 1.21/-1.47                                                                      | 3.73/-3.05                                                                      | 4.79/-2.83                                                                      | 0.88/-0.93                                                                      |

**Table S3.** Bond lengths (Å) in **1a**.

| <b>Bond Lengths (Å)</b> |                 |          |     |                  |          |
|-------------------------|-----------------|----------|-----|------------------|----------|
| Er1                     | O3              | 2.319(3) | N1  | C4               | 1.329(6) |
| Er1                     | O4 <sup>1</sup> | 2.416(3) | N1  | C2               | 1.429(6) |
| Er1                     | O7              | 2.377(3) | C7  | C8               | 1.385(7) |
| Er1                     | O5              | 2.377(3) | C7  | C6               | 1.396(6) |
| Er1                     | O1              | 2.409(3) | C8  | C6 <sup>1</sup>  | 1.545(6) |
| Er1                     | O2 <sup>2</sup> | 2.426(3) | N7  | C12              | 1.435(6) |
| Er1                     | O8              | 2.369(3) | N7  | N8               | 1.377(5) |
| Er1                     | O6 <sup>3</sup> | 2.433(3) | N7  | C14              | 1.323(6) |
| Er1                     | N3 <sup>4</sup> | 2.461(4) | N2  | C5               | 1.313(6) |
| O3                      | C6              | 1.247(6) | N6  | C9               | 1.337(6) |
| O4                      | C8              | 1.250(5) | N6  | C10              | 1.342(7) |
| O5                      | C11             | 1.254(6) | C12 | C13              | 1.397(7) |
| O1                      | C1              | 1.241(6) | C12 | C11              | 1.395(7) |
| O2                      | C3              | 1.268(6) | N9  | C14              | 1.314(6) |
| O6                      | C13             | 1.246(6) | N9  | C15              | 1.356(7) |
| N3                      | C4              | 1.331(6) | N5  | C10              | 1.320(7) |
| N3                      | C5              | 1.347(6) | N8  | C15              | 1.318(6) |
| N4                      | C7              | 1.438(6) | C2  | C1               | 1.404(6) |
| N4                      | N5              | 1.367(5) | C2  | C3               | 1.386(7) |
| N4                      | C9              | 1.326(6) | C13 | C11 <sup>3</sup> | 1.530(6) |
| N1                      | N2              | 1.369(6) | C1  | C3 <sup>2</sup>  | 1.532(6) |

**Table S4.** Bond angles (°) in **1a**.

| <b>Bond Angles (°)</b> |     |                 |            |     |     |                 |          |
|------------------------|-----|-----------------|------------|-----|-----|-----------------|----------|
| O3                     | Er1 | O4 <sup>1</sup> | 66.19(10)  | C9  | N4  | C7              | 129.6(4) |
| O3                     | Er1 | O7              | 87.90(11)  | C9  | N4  | N5              | 108.9(4) |
| O3                     | Er1 | O5              | 72.95(11)  | N2  | N1  | C2              | 121.1(4) |
| O3                     | Er1 | O1              | 69.95(11)  | C4  | N1  | N2              | 110.1(4) |
| O3                     | Er1 | O2 <sup>2</sup> | 135.11(11) | C4  | N1  | C2              | 128.8(4) |
| O3                     | Er1 | O8              | 83.36(11)  | C8  | C7  | N4              | 122.0(4) |
| O3                     | Er1 | O6 <sup>3</sup> | 134.50(11) | C8  | C7  | C6              | 120.2(4) |
| O3                     | Er1 | N3 <sup>4</sup> | 141.28(13) | C6  | C7  | N4              | 117.8(4) |
| O4 <sup>1</sup>        | Er1 | O2 <sup>2</sup> | 137.35(11) | O4  | C8  | C7              | 125.8(4) |
| O4 <sup>1</sup>        | Er1 | O6 <sup>3</sup> | 132.63(11) | O4  | C8  | C6 <sup>1</sup> | 114.5(4) |
| O4 <sup>1</sup>        | Er1 | N3 <sup>4</sup> | 75.13(12)  | C7  | C8  | C6 <sup>1</sup> | 119.7(4) |
| O7                     | Er1 | O4 <sup>1</sup> | 68.06(12)  | N8  | N7  | C12             | 122.0(4) |
| O7                     | Er1 | O5              | 137.77(11) | C14 | N7  | C12             | 127.9(4) |
| O7                     | Er1 | O1              | 69.60(11)  | C14 | N7  | N8              | 110.1(4) |
| O7                     | Er1 | O2 <sup>2</sup> | 75.70(12)  | C5  | N2  | N1              | 101.9(4) |
| O7                     | Er1 | O6 <sup>3</sup> | 135.81(12) | C9  | N6  | C10             | 101.2(4) |
| O7                     | Er1 | N3 <sup>4</sup> | 79.16(12)  | O3  | C6  | C7              | 125.2(4) |
| O5                     | Er1 | O4 <sup>1</sup> | 130.45(11) | O3  | C6  | C8 <sup>1</sup> | 114.8(4) |
| O5                     | Er1 | O1              | 68.53(12)  | C7  | C6  | C8 <sup>1</sup> | 120.0(4) |
| O5                     | Er1 | O2 <sup>2</sup> | 91.64(12)  | C13 | C12 | N7              | 118.1(4) |
| O5                     | Er1 | O6 <sup>3</sup> | 65.36(11)  | C11 | C12 | N7              | 119.5(4) |
| O5                     | Er1 | N3 <sup>4</sup> | 137.59(12) | C11 | C12 | C13             | 122.2(4) |
| O1                     | Er1 | O4 <sup>1</sup> | 118.62(11) | C14 | N9  | C15             | 103.0(4) |
| O1                     | Er1 | O2 <sup>2</sup> | 65.18(10)  | N1  | C4  | N3              | 109.7(4) |
| O1                     | Er1 | O6 <sup>3</sup> | 108.72(12) | C10 | N5  | N4              | 101.9(4) |
| O1                     | Er1 | N3 <sup>4</sup> | 135.17(12) | C15 | N8  | N7              | 101.2(4) |

|                 |     |                  |            |     |     |                  |          |
|-----------------|-----|------------------|------------|-----|-----|------------------|----------|
| O2 <sup>2</sup> | Er1 | O6 <sup>3</sup>  | 65.14(12)  | C1  | C2  | N1               | 117.7(4) |
| O2 <sup>2</sup> | Er1 | N3 <sup>4</sup>  | 76.69(12)  | C3  | C2  | N1               | 120.4(4) |
| O8              | Er1 | O4 <sup>1</sup>  | 68.63(12)  | C3  | C2  | C1               | 121.9(4) |
| O8              | Er1 | O7               | 135.63(13) | O6  | C13 | C12              | 125.3(4) |
| O8              | Er1 | O5               | 80.19(12)  | O6  | C13 | C11 <sup>3</sup> | 115.4(4) |
| O8              | Er1 | O1               | 143.41(11) | C12 | C13 | C11 <sup>3</sup> | 119.3(4) |
| O8              | Er1 | O2 <sup>2</sup>  | 136.39(11) | N2  | C5  | N3               | 115.3(5) |
| O8              | Er1 | O6 <sup>3</sup>  | 72.65(12)  | O5  | C11 | C12              | 126.5(4) |
| O8              | Er1 | N3 <sup>4</sup>  | 81.06(13)  | O5  | C11 | C13 <sup>3</sup> | 115.1(4) |
| O6 <sup>3</sup> | Er1 | N3 <sup>4</sup>  | 72.83(12)  | C12 | C11 | C13 <sup>3</sup> | 118.4(4) |
| C6              | O3  | Er1              | 124.0(3)   | O1  | C1  | C2               | 125.1(4) |
| C8              | O4  | Er1 <sup>1</sup> | 120.4(3)   | O1  | C1  | C3 <sup>2</sup>  | 115.5(4) |
| C11             | O5  | Er1              | 119.5(3)   | C2  | C1  | C3 <sup>2</sup>  | 119.4(4) |
| C1              | O1  | Er1              | 122.4(3)   | O2  | C3  | C2               | 126.5(4) |
| C3              | O2  | Er1 <sup>2</sup> | 120.6(3)   | O2  | C3  | C1 <sup>2</sup>  | 115.0(4) |
| C13             | O6  | Er1 <sup>3</sup> | 118.1(3)   | C2  | C3  | C1 <sup>2</sup>  | 118.6(4) |
| C4              | N3  | Er1 <sup>5</sup> | 127.4(3)   | N9  | C14 | N7               | 110.5(4) |
| C4              | N3  | C5               | 103.0(4)   | N4  | C9  | N6               | 111.6(5) |
| C5              | N3  | Er1 <sup>5</sup> | 128.7(3)   | N8  | C15 | N9               | 115.2(4) |
| N5              | N4  | C7               | 121.5(4)   | N5  | C10 | N6               | 116.3(4) |

**Table S5.** Bond lengths (Å) in **1b**.

| Bond lengths (Å) |                 |          |     |                  |          |
|------------------|-----------------|----------|-----|------------------|----------|
| C1               | C2              | 1.395(3) | C11 | C13 <sup>3</sup> | 1.530(3) |
| C1               | C3 <sup>1</sup> | 1.530(3) | C11 | O5               | 1.256(3) |
| C1               | O1              | 1.254(3) | C12 | C13              | 1.407(3) |
| C2               | C3              | 1.400(3) | C12 | N7               | 1.425(3) |
| C2               | N1              | 1.420(3) | C13 | O6               | 1.241(3) |



|     |                 |          |     |                 |            |
|-----|-----------------|----------|-----|-----------------|------------|
| C3  | O2              | 1.245(3) | C14 | N8              | 1.315(3)   |
| C4  | N1              | 1.333(3) | C14 | N9              | 1.357(3)   |
| C4  | N3              | 1.317(3) | C15 | N7              | 1.331(3)   |
| C5  | N2              | 1.315(3) | C15 | N9              | 1.322(3)   |
| C5  | N3              | 1.355(3) | Er1 | N6 <sup>4</sup> | 2.5317(19) |
| C6  | C7              | 1.397(3) | Er1 | O1              | 2.3648(15) |
| C6  | C8 <sup>2</sup> | 1.537(3) | Er1 | O2 <sup>1</sup> | 2.5060(16) |
| C6  | O3              | 1.256(3) | Er1 | O3              | 2.3505(15) |
| C7  | C8              | 1.403(3) | Er1 | O4 <sup>2</sup> | 2.3928(15) |
| C7  | N4              | 1.427(3) | Er1 | O5              | 2.3336(15) |
| C8  | O4              | 1.242(3) | Er1 | O6 <sup>3</sup> | 2.4919(15) |
| C9  | N4              | 1.332(3) | Er1 | O7              | 2.3245(15) |
| C9  | N6              | 1.320(3) | Er1 | O8              | 2.3423(16) |
| C10 | N5              | 1.310(3) | N1  | N2              | 1.368(3)   |
| C10 | N6              | 1.356(3) | N4  | N5              | 1.369(3)   |
| C11 | C12             | 1.393(3) | N7  | N8              | 1.370(3)   |

**Table S6.** Bond angles (°) in **1b**.

| <b>Bond Angles (°)</b> |    |                 |            |                 |     |                 |           |
|------------------------|----|-----------------|------------|-----------------|-----|-----------------|-----------|
| C2                     | C1 | C3 <sup>1</sup> | 120.9(2)   | O5              | Er1 | N6 <sup>4</sup> | 70.51(6)  |
| O1                     | C1 | C2              | 124.0(2)   | O5              | Er1 | O1              | 137.48(5) |
| O1                     | C1 | C3 <sup>1</sup> | 115.13(19) | O5              | Er1 | O2 <sup>1</sup> | 142.92(5) |
| C1                     | C2 | C3              | 121.5(2)   | O5              | Er1 | O3              | 135.83(5) |
| C1                     | C2 | N1              | 116.9(2)   | O5              | Er1 | O4 <sup>2</sup> | 91.72(5)  |
| C3                     | C2 | N1              | 121.6(2)   | O5              | Er1 | O6 <sup>3</sup> | 65.68(5)  |
| C2                     | C3 | C1 <sup>1</sup> | 117.58(19) | O5              | Er1 | O8              | 77.04(6)  |
| O2                     | C3 | C1 <sup>1</sup> | 115.53(19) | O6 <sup>3</sup> | Er1 | N6 <sup>4</sup> | 117.29(6) |
| O2                     | C3 | C2              | 126.9(2)   | O6 <sup>3</sup> | Er1 | O2 <sup>1</sup> | 126.52(5) |

|     |     |                  |            |     |     |                  |            |
|-----|-----|------------------|------------|-----|-----|------------------|------------|
| N3  | C4  | N1               | 111.7(2)   | O7  | Er1 | N6 <sup>4</sup>  | 142.02(6)  |
| N2  | C5  | N3               | 115.8(2)   | O7  | Er1 | O1               | 137.57(6)  |
| C7  | C6  | C8 <sup>2</sup>  | 119.35(19) | O7  | Er1 | O2 <sup>1</sup>  | 73.46(5)   |
| O3  | C6  | C7               | 124.4(2)   | O7  | Er1 | O3               | 87.57(5)   |
| O3  | C6  | C8 <sup>2</sup>  | 116.27(19) | O7  | Er1 | O4 <sup>2</sup>  | 136.38(5)  |
| C6  | C7  | C8               | 122.5(2)   | O7  | Er1 | O5               | 81.29(6)   |
| C6  | C7  | N4               | 118.09(19) | O7  | Er1 | O6 <sup>3</sup>  | 69.99(5)   |
| C8  | C7  | N4               | 119.44(19) | O7  | Er1 | O8               | 76.67(6)   |
| C7  | C8  | C6 <sup>2</sup>  | 118.17(19) | O8  | Er1 | N6 <sup>4</sup>  | 72.67(6)   |
| O4  | C8  | C6 <sup>2</sup>  | 116.60(19) | O8  | Er1 | O1               | 93.86(6)   |
| O4  | C8  | C7               | 125.2(2)   | O8  | Er1 | O2 <sup>1</sup>  | 71.09(5)   |
| N6  | C9  | N4               | 110.48(19) | O8  | Er1 | O3               | 141.17(6)  |
| N5  | C10 | N6               | 114.8(2)   | O8  | Er1 | O4 <sup>2</sup>  | 143.62(5)  |
| C12 | C11 | C13 <sup>3</sup> | 119.83(19) | O8  | Er1 | O6 <sup>3</sup>  | 132.66(5)  |
| O5  | C11 | C12              | 124.4(2)   | C4  | N1  | C2               | 127.2(2)   |
| O5  | C11 | C13 <sup>3</sup> | 115.79(19) | C4  | N1  | N2               | 108.81(19) |
| C11 | C12 | C13              | 122.2(2)   | N2  | N1  | C2               | 123.31(19) |
| C11 | C12 | N7               | 116.91(19) | C5  | N2  | N1               | 102.0(2)   |
| C13 | C12 | N7               | 120.81(19) | C4  | N3  | C5               | 101.6(2)   |
| C12 | C13 | C11 <sup>3</sup> | 117.95(19) | C9  | N4  | C7               | 129.33(19) |
| O6  | C13 | C11 <sup>3</sup> | 115.98(19) | C9  | N4  | N5               | 109.27(18) |
| O6  | C13 | C12              | 126.1(2)   | N5  | N4  | C7               | 121.24(18) |
| N8  | C14 | N9               | 114.4(2)   | C10 | N5  | N4               | 102.55(18) |
| N9  | C15 | N7               | 110.4(2)   | C9  | N6  | C10              | 102.90(19) |
| O1  | Er1 | N6 <sup>4</sup>  | 67.15(6)   | C9  | N6  | Er1 <sup>5</sup> | 129.68(15) |
| O1  | Er1 | O2 <sup>1</sup>  | 64.42(5)   | C10 | N6  | Er1 <sup>5</sup> | 126.94(15) |
| O1  | Er1 | O4 <sup>2</sup>  | 71.19(5)   | C15 | N7  | C12              | 129.08(19) |
| O1  | Er1 | O6 <sup>3</sup>  | 133.34(5)  | C15 | N7  | N8               | 109.30(18) |

|                 |     |                 |           |     |    |                  |            |
|-----------------|-----|-----------------|-----------|-----|----|------------------|------------|
| O2 <sup>1</sup> | Er1 | N6 <sup>4</sup> | 115.65(6) | N8  | N7 | C12              | 119.53(18) |
| O3              | Er1 | N6 <sup>4</sup> | 130.40(6) | C14 | N8 | N7               | 102.70(18) |
| O3              | Er1 | O1              | 74.20(5)  | C15 | N9 | C14              | 103.18(19) |
| O3              | Er1 | O2 <sup>1</sup> | 70.45(5)  | C1  | O1 | Er1              | 125.02(14) |
| O3              | Er1 | O4 <sup>2</sup> | 67.91(5)  | C3  | O2 | Er1 <sup>1</sup> | 119.87(14) |
| O3              | Er1 | O6 <sup>3</sup> | 70.33(5)  | C6  | O3 | Er1              | 118.11(14) |
| O4 <sup>2</sup> | Er1 | N6 <sup>4</sup> | 70.96(6)  | C8  | O4 | Er1 <sup>2</sup> | 117.28(14) |
| O4 <sup>2</sup> | Er1 | O2 <sup>1</sup> | 125.26(5) | C11 | O5 | Er1              | 123.67(14) |
| O4 <sup>2</sup> | Er1 | O6 <sup>3</sup> | 67.97(5)  | C13 | O6 | Er1 <sup>3</sup> | 118.39(14) |

**Table S7.** Bond lengths (Å) in **1a\_des** (vacuum).

| Bond lengths (Å) |                   |           |      |                   |         |
|------------------|-------------------|-----------|------|-------------------|---------|
| Er01             | O002              | 2.264(17) | N00B | C00V              | 1.37(3) |
| Er01             | O003              | 2.430(16) | N00D | C00N              | 1.28(3) |
| Er01             | O004              | 2.388(14) | N00D | C00O              | 1.36(3) |
| Er01             | O005              | 2.285(16) | N00E | N00L              | 1.36(3) |
| Er01             | O006              | 2.264(17) | N00E | C00T              | 1.30(3) |
| Er01             | O007 <sup>1</sup> | 2.418(17) | N00E | C00W              | 1.41(3) |
| Er01             | O00A <sup>2</sup> | 2.394(17) | N00G | C00O              | 1.32(3) |
| Er01             | N00B <sup>3</sup> | 2.47(2)   | N00H | C00V              | 1.34(3) |
| O002             | C00S              | 1.25(2)   | C00I | C00R              | 1.42(3) |
| O003             | C00K              | 1.22(3)   | C00I | C00U              | 1.40(3) |
| O004             | C00M              | 1.25(3)   | C00J | C00M              | 1.36(3) |
| O005             | C00U              | 1.26(2)   | C00J | C00P              | 1.38(3) |
| O007             | C00P              | 1.23(3)   | C00K | C00S              | 1.60(3) |
| N008             | C00F              | 1.37(3)   | C00K | C00W <sup>4</sup> | 1.45(3) |
| N008             | N00H              | 1.33(3)   | N00L | C00X              | 1.33(3) |
| N008             | C00J              | 1.45(3)   | C00M | C00P <sup>1</sup> | 1.57(3) |

|      |      |         |      |                   |         |
|------|------|---------|------|-------------------|---------|
| N009 | N00G | 1.42(2) | N00Q | C00T              | 1.36(3) |
| N009 | C00I | 1.38(3) | N00Q | C00X              | 1.36(3) |
| N009 | C00N | 1.32(3) | C00R | C00U <sup>2</sup> | 1.55(3) |
| O00A | C00R | 1.24(3) | C00S | C00W              | 1.37(3) |
| N00B | C00F | 1.35(3) |      |                   |         |

**Table S8.** Bond angles (°) in **1a\_des** (vacuum).

| Bond Angles (°) |      |                   |          |                   |      |                   |           |
|-----------------|------|-------------------|----------|-------------------|------|-------------------|-----------|
| O002            | Er01 | O003              | 66.3(5)  | C00V              | N00B | Er01 <sup>3</sup> | 131.5(15) |
| O002            | Er01 | O004              | 87.0(6)  | C00N              | N00D | C00O              | 102(2)    |
| O002            | Er01 | O005              | 148.5(5) | N00L              | N00E | C00W              | 121(2)    |
| O002            | Er01 | O007 <sup>1</sup> | 76.8(6)  | C00T              | N00E | N00L              | 110(2)    |
| O002            | Er01 | O00A <sup>2</sup> | 81.7(6)  | C00T              | N00E | C00W              | 129(2)    |
| O002            | Er01 | N00B <sup>3</sup> | 141.3(6) | N00B              | C00F | N008              | 107(2)    |
| O003            | Er01 | N00B <sup>3</sup> | 75.0(6)  | C00O              | N00G | N009              | 101.0(19) |
| O004            | Er01 | O003              | 66.3(5)  | N008              | N00H | C00V              | 103(2)    |
| O004            | Er01 | O007 <sup>1</sup> | 64.2(5)  | N009              | C00I | C00R              | 118(2)    |
| O004            | Er01 | O00A <sup>2</sup> | 130.6(5) | N009              | C00I | C00U              | 124(2)    |
| O004            | Er01 | N00B <sup>3</sup> | 78.3(5)  | C00U              | C00I | C00R              | 118(2)    |
| O005            | Er01 | O003              | 144.5(6) | C00M              | C00J | N008              | 118(2)    |
| O005            | Er01 | O004              | 109.8(6) | C00M              | C00J | C00P              | 124(2)    |
| O005            | Er01 | O007 <sup>1</sup> | 86.8(6)  | C00P              | C00J | N008              | 118(2)    |
| O005            | Er01 | O00A <sup>2</sup> | 67.1(6)  | O003              | C00K | C00S              | 116.7(17) |
| O005            | Er01 | N00B <sup>3</sup> | 69.8(6)  | O003              | C00K | C00W <sup>4</sup> | 125(2)    |
| O006            | Er01 | O002              | 85.5(6)  | C00W <sup>4</sup> | C00K | C00S              | 118.0(19) |
| O006            | Er01 | O003              | 77.1(5)  | C00X              | N00L | N00E              | 101(2)    |
| O006            | Er01 | O004              | 142.5(6) | O004              | C00M | C00J              | 128(2)    |

|                   |      |                   |           |      |      |                   |           |
|-------------------|------|-------------------|-----------|------|------|-------------------|-----------|
| O006              | Er01 | O005              | 95.1(6)   | O004 | C00M | C00P <sup>1</sup> | 112.8(19) |
| O006              | Er01 | O007 <sup>1</sup> | 147.5(6)  | C00J | C00M | C00P <sup>1</sup> | 119(2)    |
| O006              | Er01 | O00A <sup>2</sup> | 84.5(6)   | N00D | C00N | N009              | 114(2)    |
| O006              | Er01 | N00B <sup>3</sup> | 84.9(6)   | N00G | C00O | N00D              | 116(2)    |
| O007 <sup>1</sup> | Er01 | O003              | 118.3(5)  | O007 | C00P | C00J              | 129(2)    |
| O007 <sup>1</sup> | Er01 | N00B <sup>3</sup> | 125.5(6)  | O007 | C00P | C00M <sup>1</sup> | 114(2)    |
| O00A <sup>2</sup> | Er01 | O003              | 143.9(5)  | C00J | C00P | C00M <sup>1</sup> | 117(2)    |
| O00A <sup>2</sup> | Er01 | O007 <sup>1</sup> | 66.4(5)   | C00X | N00Q | C00T              | 99(2)     |
| O00A <sup>2</sup> | Er01 | N00B <sup>3</sup> | 134.3(6)  | O00A | C00R | C00I              | 125(2)    |
| C00S              | O002 | Er01              | 124.4(14) | O00A | C00R | C00U <sup>2</sup> | 113.7(19) |
| C00K              | O003 | Er01              | 116.6(13) | C00I | C00R | C00U <sup>2</sup> | 121(2)    |
| C00M              | O004 | Er01              | 121.2(14) | O002 | C00S | C00K              | 110.0(19) |
| C00U              | O005 | Er01              | 120.2(16) | O002 | C00S | C00W              | 130(2)    |
| C00P              | O007 | Er01 <sup>1</sup> | 121.0(14) | C00W | C00S | C00K              | 119.6(17) |
| C00F              | N008 | C00J              | 121.7(19) | N00E | C00T | N00Q              | 113(2)    |
| N00H              | N008 | C00F              | 112.3(19) | O005 | C00U | C00I              | 123(2)    |
| N00H              | N008 | C00J              | 126(2)    | O005 | C00U | C00R <sup>2</sup> | 115(2)    |
| C00I              | N009 | N00G              | 120.3(19) | C00I | C00U | C00R <sup>2</sup> | 121.5(19) |
| C00N              | N009 | N00G              | 107.0(19) | N00H | C00V | N00B              | 113(2)    |
| C00N              | N009 | C00I              | 132.5(19) | N00E | C00W | C00K <sup>4</sup> | 119(2)    |
| C00R              | O00A | Er01 <sup>2</sup> | 116.0(15) | C00S | C00W | N00E              | 118.3(19) |
| C00F              | N00B | Er01 <sup>3</sup> | 123.5(17) | C00S | C00W | C00K <sup>4</sup> | 122(2)    |
| C00F              | N00B | C00V              | 105(2)    | N00L | C00X | N00Q              | 118(2)    |

---

**Table S9.** Continuous SHAPE measurement (CShM) values of the 13 possible coordination geometries for the Er<sup>III</sup> ion with coordination number 9 in **1a** and **1b**.<sup>7</sup>

|          | <b>1a</b> | <b>1b</b> |
|----------|-----------|-----------|
| EP-9     | 35.360    | 37.136    |
| OPY-9    | 23.761    | 21.660    |
| HBPY-9   | 19.013    | 19.640    |
| JTC-9    | 15.518    | 15.966    |
| JCCU-9   | 10.426    | 10.461    |
| CCU-9    | 9.140     | 9.497     |
| JCSAPR-9 | 1.676     | 1.672     |
| CSAPR-9  | 0.565     | 0.976     |
| JTCTPR-9 | 2.191     | 1.653     |
| TCTPR-9  | 0.979     | 0.532     |
| JTDIC-9  | 13.722    | 12.866    |
| HH-9     | 11.792    | 11.302    |
| MFF-9    | 0.590     | 1.384     |

EP-9 = Enneagon; OPY-9 = Octagonal pyramid; HBPY-9 = Heptagonal bipyramid; JTC-9 = Johnson triangular cupola J3; JCCU-9 = Capped cube J8; CCU-9 = Spherical-relaxed capped cube; JCSAPR-9 = Capped square antiprism J10; CSAPR-9 = Spherical capped square antiprism; JTCTPR-9 = Tricapped trigonal prism J51; TCTPR-9 = Spherical tricapped trigonal prism; JTDIC-9 = Tridiminished icosahedron J63; HH-9 = Hula-hoop; MFF-9 = Muffin

**Table S10.** Continuous SHAPE measurement (CShM) values of the 13 possible coordination geometries for the Er<sup>III</sup> ion with coordination number 8 in **1a\_des**.<sup>7</sup>

|          |        |
|----------|--------|
| OP-8     | 30.477 |
| HPY-8    | 23.286 |
| HBPY-8   | 15.656 |
| CU-8     | 12.267 |
| SAPR-8   | 4.494  |
| TDD-8    | 1.887  |
| JGBF-8   | 12.433 |
| JETBPY-8 | 25.772 |
| JBTPR-8  | 2.803  |
| BTPR-8   | 2.103  |
| JSD-8    | 3.334  |
| TT-8     | 12.666 |
| ETBPY-8  | 22.346 |

OP-8 = Octagon; HPY-8 = Heptagonal pyramid; HBPY-8 = Hexagonal bipyramid; CU-8 = Cube; SAPR-8 = Square antiprism; TDD-8 = Triangular dodecahedron; JGBF-8 = Johnson gyrobifastigium J26; JETBPY-8 = Johnson elongated triangular bipyramid J14; JBTPR-8 = Biaugmented trigonal prism J50; BTPR-8 = Biaugmented trigonal prism; JSD-8 = Snub diphenoïd J84; TT-8 = Triakis tetrahedron; ETBPY-8 = Elongated trigonal bipyramid.

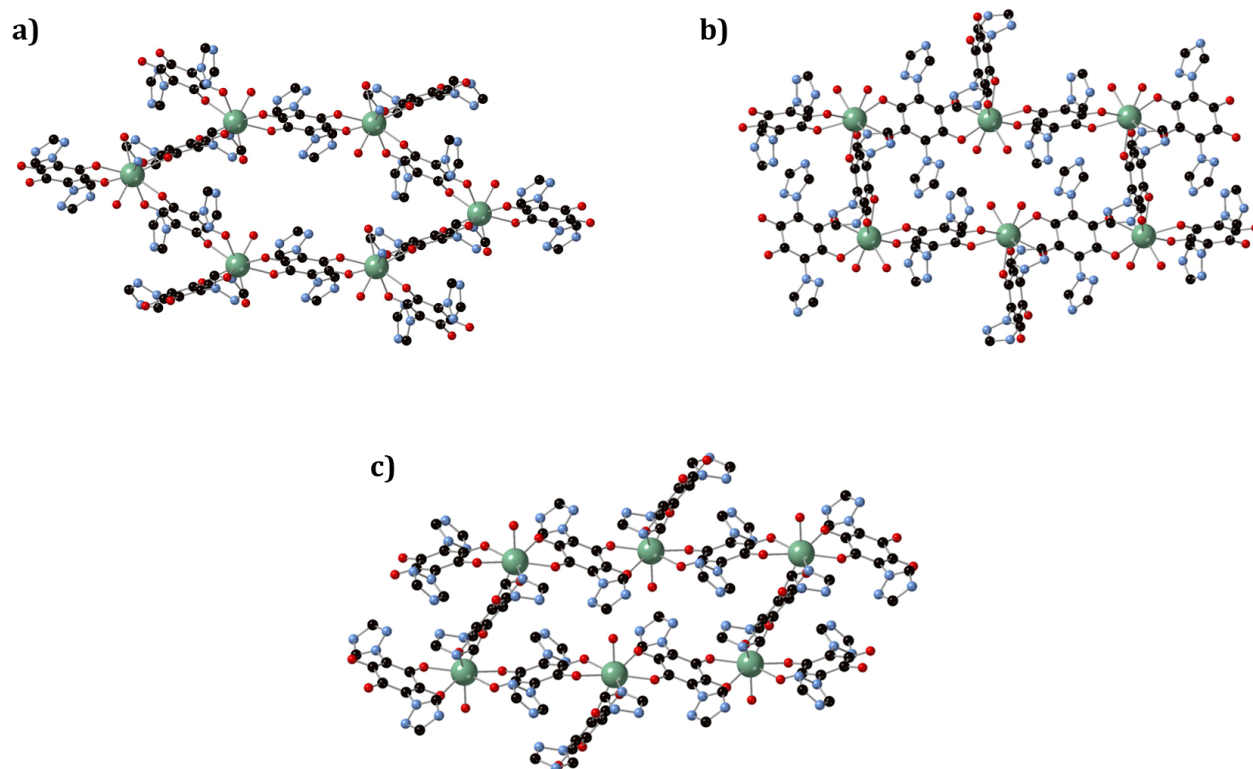

**Figure S2.** View of (a) one hexagonal cavity of **1a**, (b) one rectangular cavity of **1b** and (c) one shrunk rectangular cavity of **1a<sub>des</sub>**.



## Powder X-Ray Diffraction (PXRD)

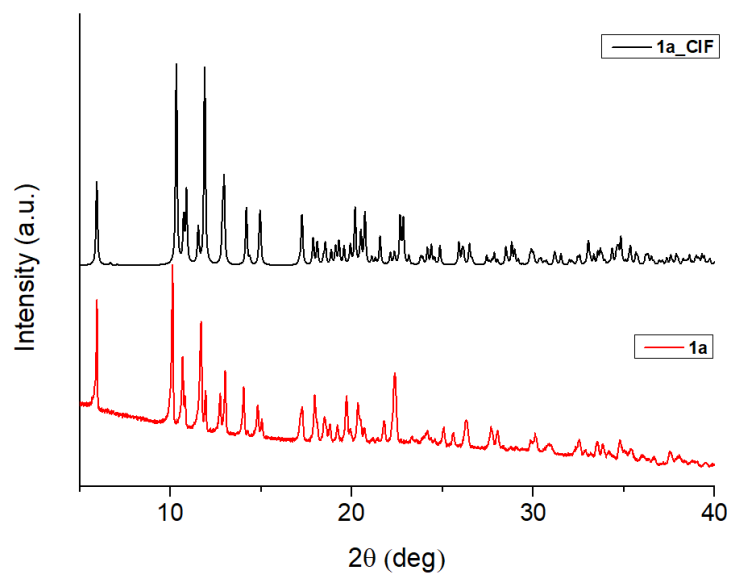

**Figure S3.** Experimental powder XRD pattern (red) and calculated pattern (black) of compound **1a**, in  $2\theta$  range of 5-40°.

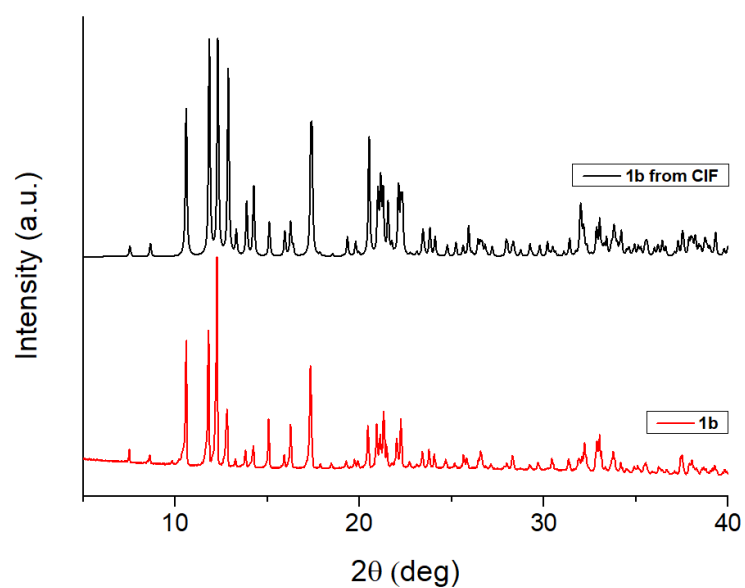

**Figure S4.** Experimental powder XRD pattern (red) and calculated pattern (black) of compound **1b**, in  $2\theta$  range of 5-40°.

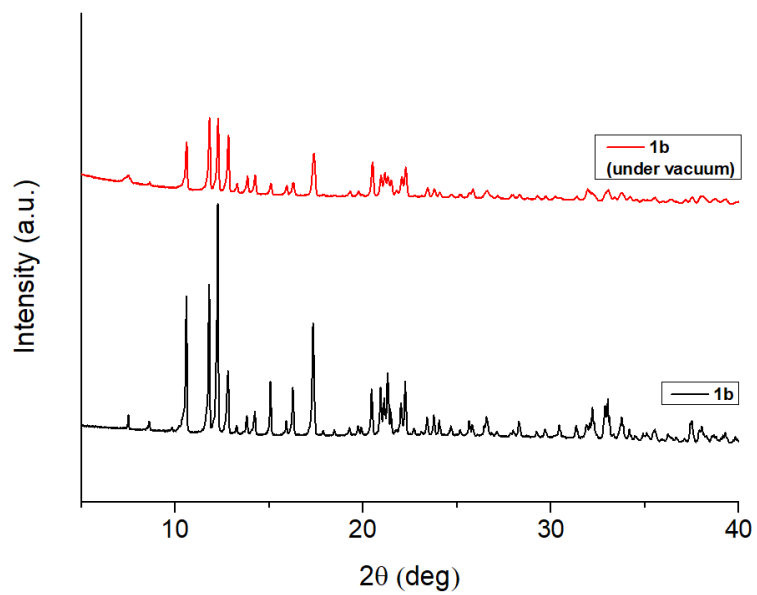

**Figure S5.** PXRD patterns of **1b** (black) and **1b** under vacuum (red) in  $2\theta$  range of 5-40°.

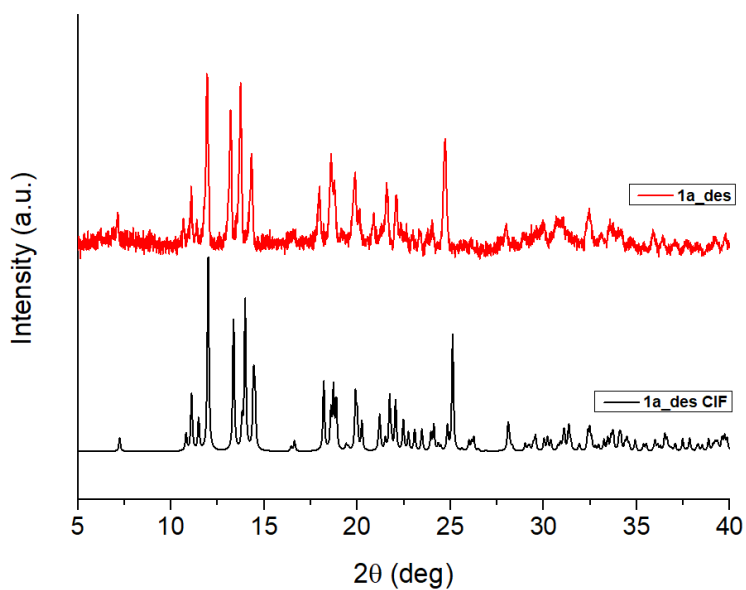

**Figure S6.** Calculated (black) and experimental (red) PXRD patterns of **1a\_des**, in  $2\theta$  range of 5-40°.

### 3. FT-IR Spectroscopy

FT-IR spectra were collected using a Bruker Equinox 55 spectrometer, preparing the samples as KBr pellets.

The spectra of **1a** and **1b** were compared with H<sub>2</sub>trz<sub>2</sub>An spectrum. As shown in figure S1, the band at 1650 cm<sup>-1</sup> of νCO of free ligand disappears and the broad band in the region around 1550 cm<sup>-1</sup> is downshifted, due to the coordination of C-O in the frameworks.

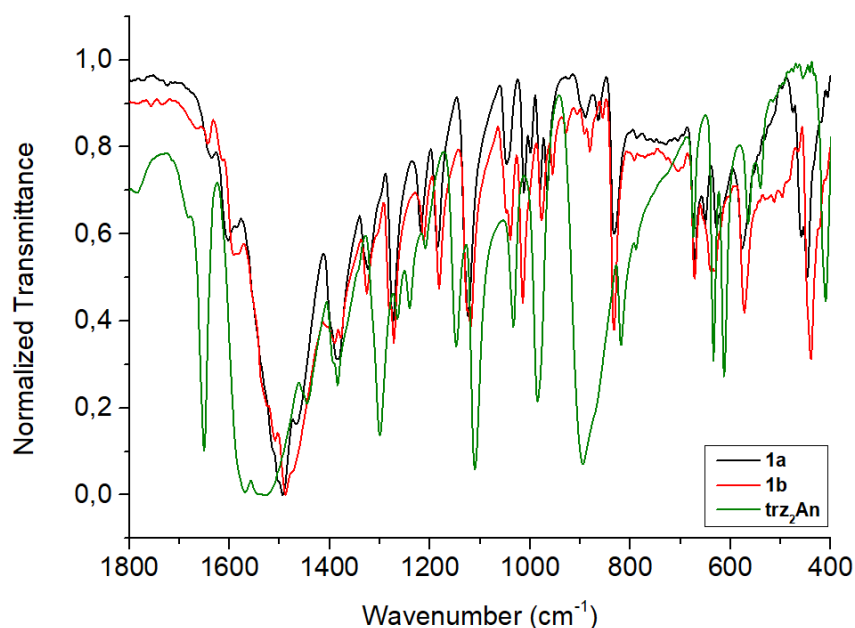

**Figure S7.** FT-IR spectra of H<sub>2</sub>trz<sub>2</sub>An (green), **1a** (black) and **1b** (red) in the 1800-400 cm<sup>-1</sup> region.

FT-IR spectra of **1a** and **1b** appear very similar and show only slight differences in the bands. The characteristic bands with their assignments are shown in the following table.

**Table S11.** Assignments of characteristic bands for compounds **1a** and **1b**, all the frequencies are in cm<sup>-1</sup>.<sup>8-11</sup>

|                        | <b>1a</b> | <b>1b</b> |
|------------------------|-----------|-----------|
| ν O-H                  | 3388      | 3438      |
| ν C=O                  | 1605      | 1589      |
| ν C=O + ν C=C aromatic | 1513      | 1506      |
|                        | 1492      | 1488      |
| ν aromatic ring        | 1385      | 1391      |
|                        |           | 1377      |
| ν C-N                  | 1321      | 1325      |
|                        | 1272      | 1278      |
|                        |           | 1272      |
| ν N-N                  | 1183      | 1181      |
| δ C=C                  | 835       | 835       |
| ν Er-O                 | 459       | 438       |
|                        | 446       |           |

#### 4. Thermogravimetric Analysis

Thermogravimetric analysis (TGA) was performed in order to study the thermal stability of both **1a** and **1b** and to have complementary information about the dehydrated phase **1a\_des**. Thus, the first weight loss of 10 % from room temperature to 350 K is consistent with the change of chemical formula from  $[\text{Er}_2(\text{trz}_2\text{An})_3(\text{H}_2\text{O})_4]_n \cdot 10\text{H}_2\text{O}$  found in **1a** by elemental analysis to  $[\text{Er}_2(\text{trz}_2\text{An})_3(\text{H}_2\text{O})_2]_n \cdot 2\text{H}_2\text{O}$  found in the structure of **1a\_des**. It was not possible to use elemental analysis to obtain the formula of this compound due to the fast rehydration of **1a\_des** in air.

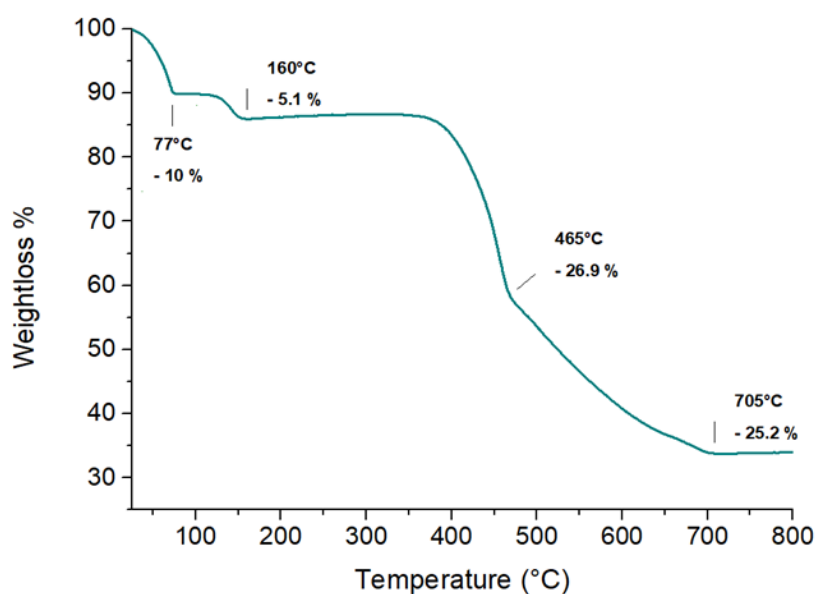

**Figure S8.** Thermogram of **1a** in 25-800°C temperature range. The percentages shown in the graph are referred to the previous weight loss.

**1a** thermogram shows a continuous weight loss of 10 % from room temperature to 77°C, which is close to the expected weight loss of 10 water molecules. Then in the 77-160°C temperature range a second weight loss is present, which is close to the expected weight loss for the remaining 2 solvate water molecules, leading to the formula  $[\text{Er}_2(\text{trz}_2\text{An})_3(\text{H}_2\text{O})_2]_n$ . Therefore, the first weight loss in the 25-77°C corresponds to half of the coordinating water molecules and part of the solvate water molecules, while the one 77-160°C it could be due to the remaining solvate water molecules. Taking into account the crystallographic data, the first weight loss is consistent with the transition from the initial compound ( $[\text{Er}_2(\text{trz}_2\text{An})_3(\text{H}_2\text{O})_4]_n \cdot 10\text{H}_2\text{O}$ ) to  $[\text{Er}_2(\text{trz}_2\text{An})_3(\text{H}_2\text{O})_2]_n \cdot 2\text{H}_2\text{O}$  of **1a\_des**. Then the second weight loss is close to the expected loss which lead to the formula  $[\text{Er}_2(\text{trz}_2\text{An})_3(\text{H}_2\text{O})_2]_n$ .

Thermogram of **1b**, reported in **Figure S8**, shows the first weight loss of 7.3% at 165°C, which correspond to 5.5 water molecules. At 213°C there is another weight loss of 2.7%, corresponding to 1.5 water molecules. As **1a**, the compound is very stable, starting its decomposition above 400°C, after the ligand decomposition.

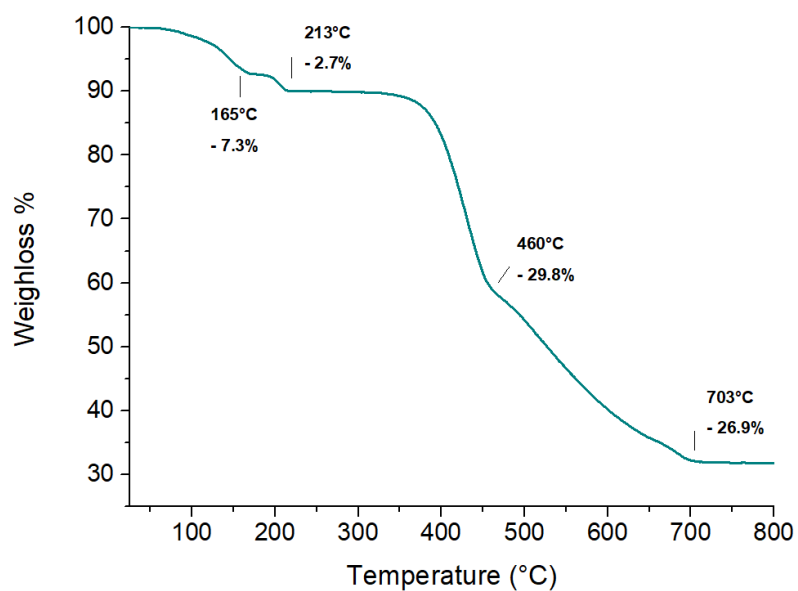

**Figure S9.** Thermogram of **1b** in 25-800°C temperature range, showing the weightlosses at different temperatures. The percentages shown in the graph refer to the previous one weightloss.

## 5. Magnetic Measurements

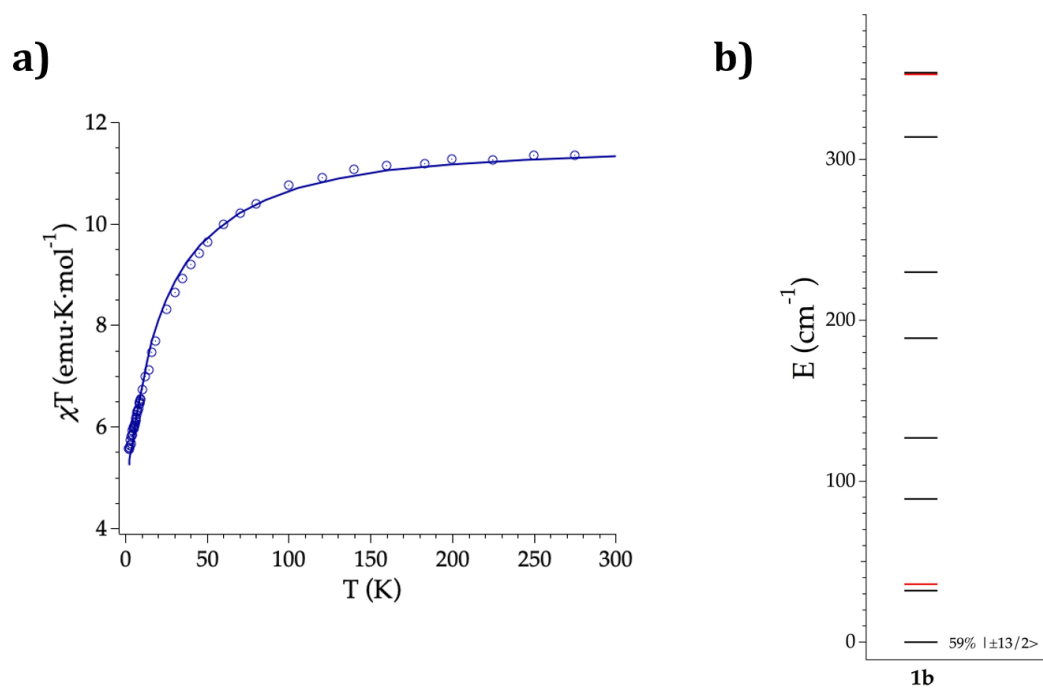

**Figure S10.** Experimental (symbols), fitted (solid line) temperature-dependence of the magnetic susceptibility from 2 to 300 K of **1b** (a); Calculated (black) and experimental (red) ground- $J$  multiplet energy levels (b). Further details are provided in **Table S12**.

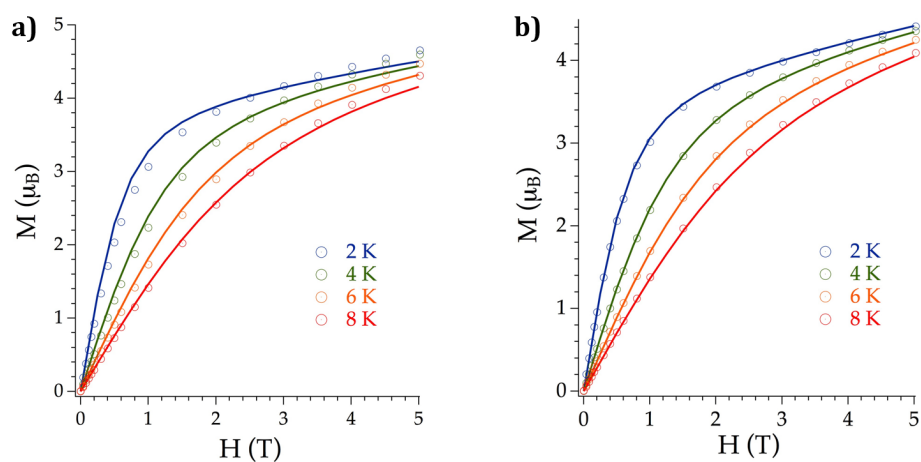

**Figure S11.** Experimental (symbols) and predicted average (lines) of magnetization  $M$  versus field  $H$  for **1a** (a) and **1a\_des** (b) at 2 K (blue), 4 K (green), 6 K (orange) and 8 K (red).

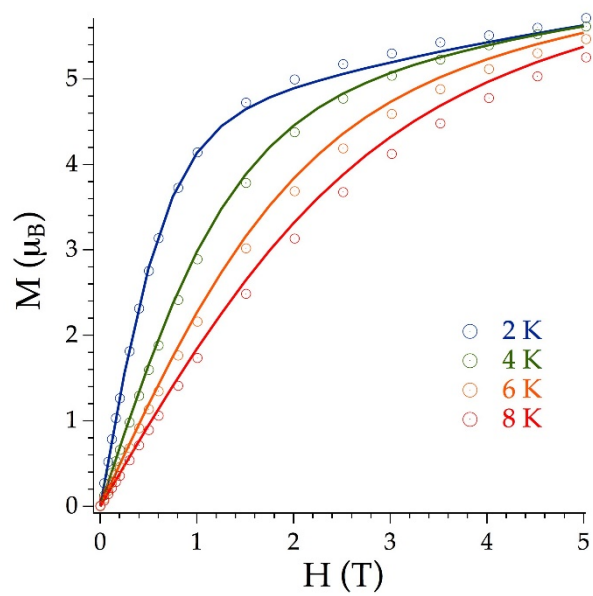

**Figure S12.** Experimental (symbols) and predicted average (lines) of magnetization  $M$  versus field  $H$  for **1b** at 2K (blue), 4 K (green), 6 K (orange) and 8 K (red).

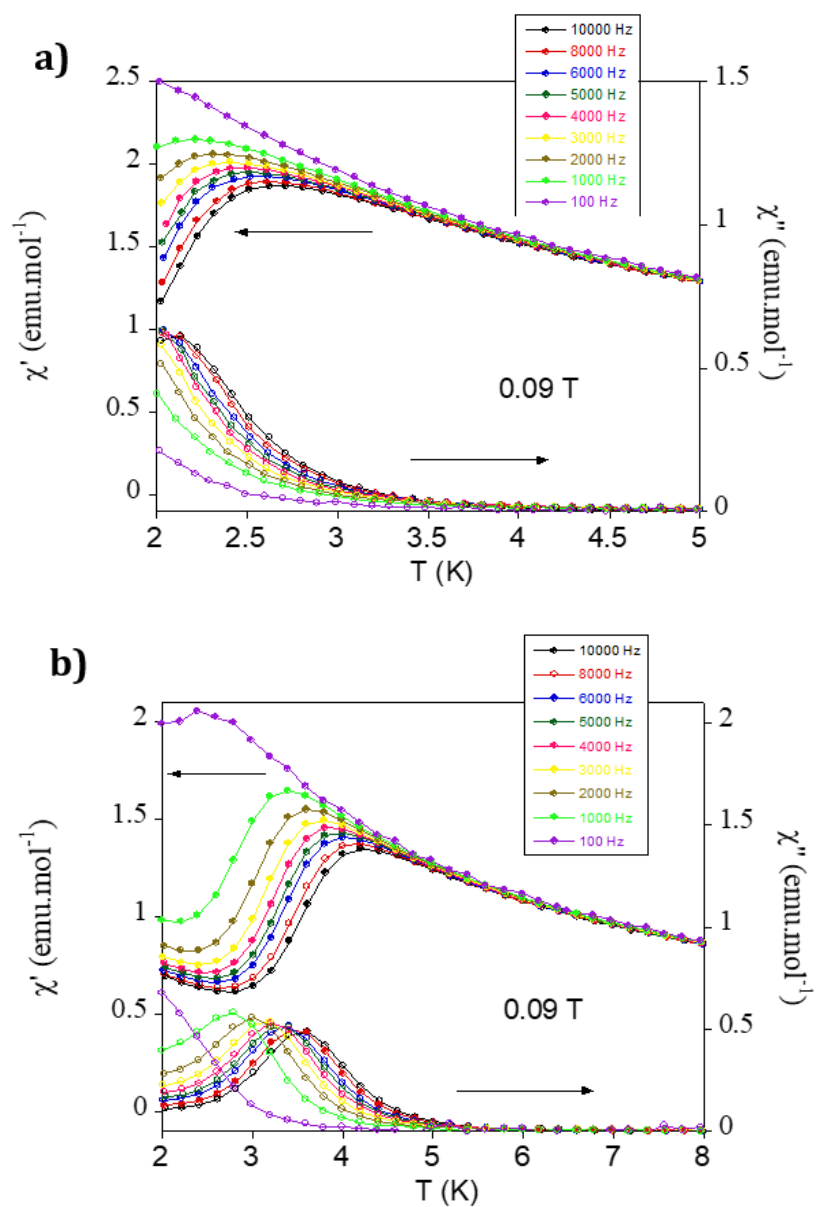

**Figure S13.** Temperature dependence of  $\chi'$  and  $\chi''$  of **1a** (a) and **1a\_des** (b) in an applied dc field of 0.09 T at frequencies in the range 100 to 10000 Hz.



a)

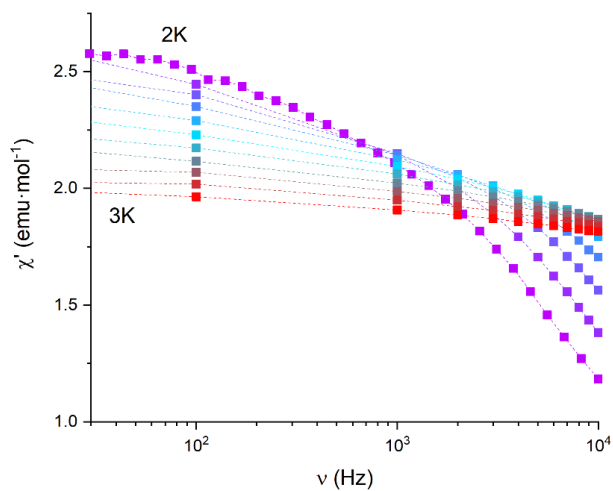

b)

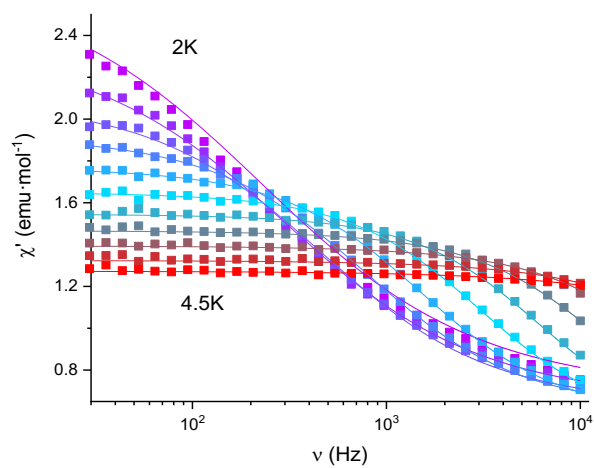

**Figure S14.** Frequency dependence of the in-of-phase component,  $\chi'$ , in an applied dc field of 0.09 T of **1a** (a) and **1a<sub>des</sub>** (b) at different temperatures. Solid lines in **1a<sub>des</sub>** represent the best fitting of the experimental data to a Debye function.

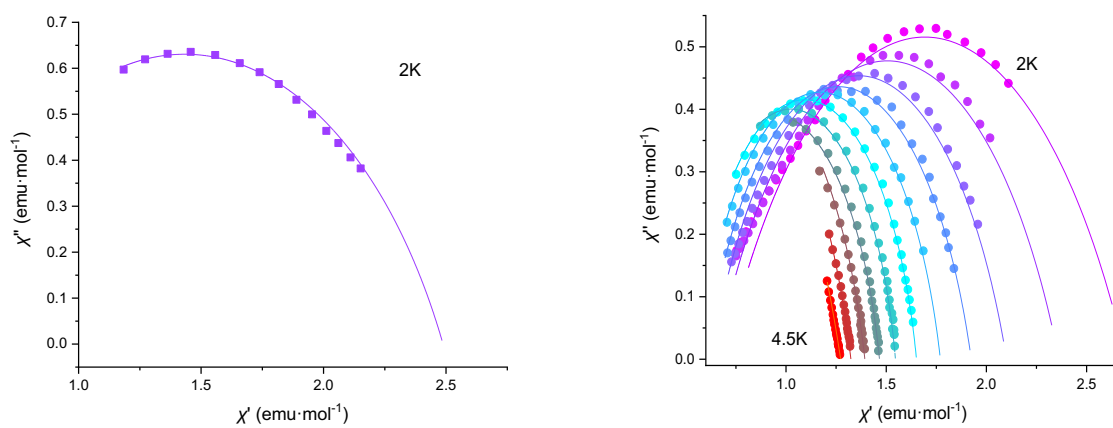

**Figure S15.** Cole-Cole plots of **1a** (left) and **1a\_des** (right). Solid lines represent the best fitting of the experimental data to a Debye function.

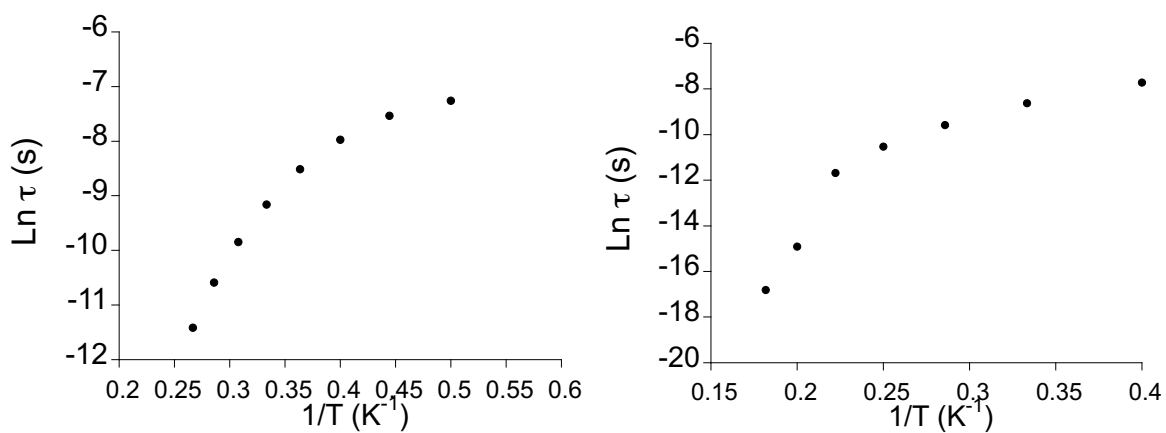

**Figure S16.** Plot of  $\text{Ln } \tau$  versus  $T^{-1}$  for **1a\_des** (left) and **1b** (right).

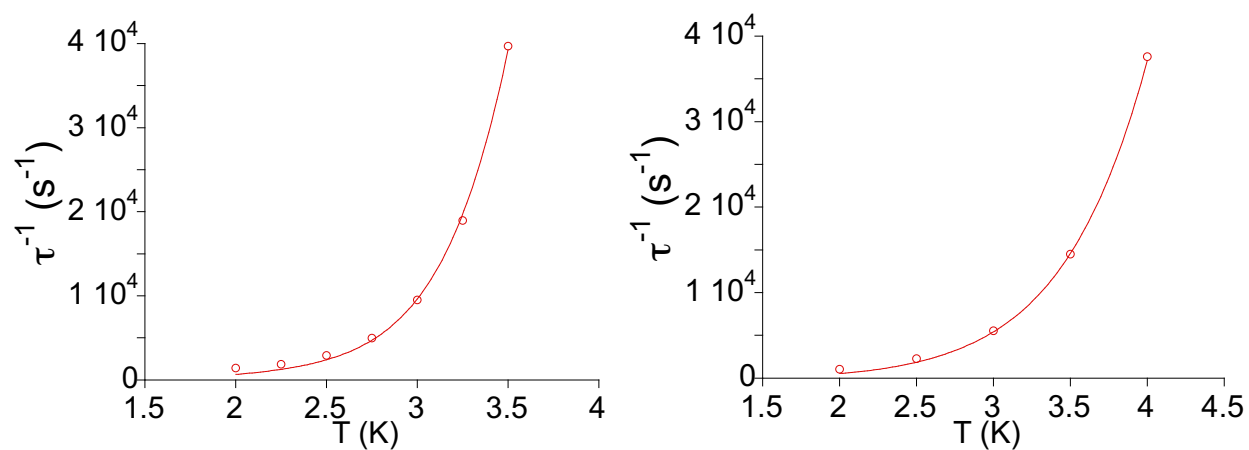

**Figure S17.** Thermal dependence of the relaxation time of **1a\_des** (left) and **1b** (right) and best fit from two terms mechanism described in text.

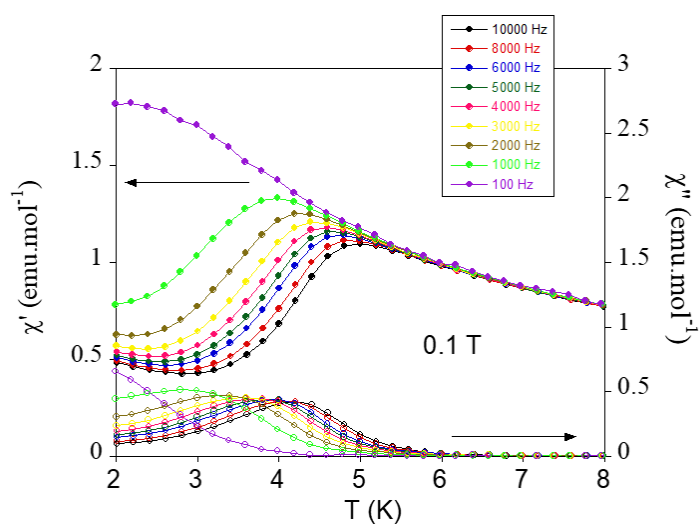

**Figure S18.** Temperature dependence of  $\chi'$  and  $\chi''$  of **1b** in an applied dc field of 0.1 T at frequencies in the range 100 to 10000 Hz.

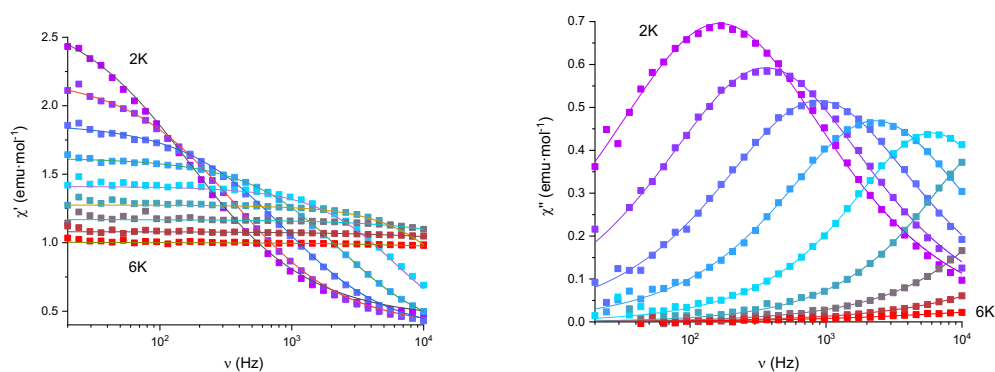

**Figure S19.** ac susceptibility in an applied dc field of 0.1 T of **1b** measured as a function of the frequency at the different temperatures (2.0, 2.5, 3.0, 3.5, 4.0, 4.5, 5.0, 5.5 and 6.0 K). Left: Real component. Right: Imaginary component. Solid lines represent the best fitting of the experimental data to a Cole-Cole function.

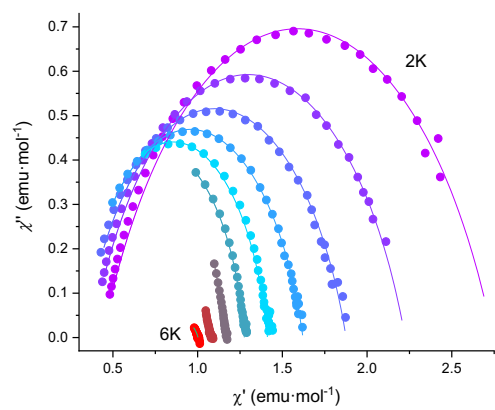

**Figure S20.** Cole-Cole plots of **1b** under an applied dc field of 0.1 T. Solid lines represent the best fitting of the experimental data to a Debye function.

## 6. Theoretical Calculations

### Radial Effective Charge (REC) model

Our calculations start with the crystallographic/non-idealized atomic coordinates of the first coordination sphere. These are introduced as an input for the portable *fortran77* software code SIMPRE.<sup>2</sup> This code parameterizes the electric field effect produced by the surrounding ligands, acting over the central ion, by using the following Crystal Field Hamiltonian expressed in terms of the Extended Stevens Operators (ESOs):<sup>12,13</sup>

$$\hat{H}_{cf}(J) = \sum_{k=2,4,6} \sum_{q=-k}^k B_k^q O_k^q = \sum_{k=2,4,6} \sum_{q=-k}^k a_k (1 - \sigma_k) A_k^q \langle r^k \rangle O_k^q \quad (1)$$

where  $k$  is the order (also called rank or degree) and  $q$  is the operator range, that varies between  $k$  and  $-k$ , of the Stevens operator equivalents  $O_k^q$  as defined by Ryabov in terms of the angular momentum operators  $J_{\pm}$  and  $J_z$ ,<sup>14</sup> where the components  $O_k^q(c)$  and  $O_k^q(s)$  correspond to the ESOs with  $q \geq 0$  and  $q < 0$  respectively.<sup>14</sup> Note that all the Stevens CF parameters  $B_k^q$  are real, whereas the matrix elements of  $O_k^q$  ( $q < 0$ ) are imaginary.  $a_k$  are the  $\alpha$ ,  $\beta$  and  $\gamma$  Stevens coefficients<sup>15</sup> for  $k = 2, 4, 6$ , respectively, which are tabulated and depend on the number of  $f$  electrons.  $\sigma_k$  are the Sternheimer shielding parameters<sup>16</sup> of the  $4f$  electronic shell, and  $\langle r^k \rangle$  are the expectation values of the radius.<sup>16</sup>

In SIMPRE, the  $A_k^q$  CF parameters are determined by the following relations:

$$A_k^0 = \frac{4\pi}{2k+1} \sum_{i=1}^N \frac{Z_i e^2}{R_i^{k+1}} Z_{k0}(\theta_i, \varphi_i) p_{kq} \quad (2.a)$$

$$A_k^q = \frac{4\pi}{2k+1} \sum_{i=1}^N \frac{Z_i e^2}{R_i^{k+1}} Z_{kq}^c(\theta_i, \varphi_i) p_{kq} \quad (2.b)$$

$$A_k^q = \frac{4\pi}{2k+1} \sum_{i=1}^N \frac{Z_i e^2}{R_i^{k+1}} Z_{klq}^s(\theta_i, \varphi_i) p_{klq} \quad (2.c)$$

In the REC model<sup>3</sup> the ligand is modeled through an effective point charge situated between the lanthanoid and the coordinated atom at a distance  $R_i$  from the magnetic centre, which is smaller than the real metal-ligand distance ( $r_i$ ). To account for the effect of covalent electron sharing, a radial displacement vector ( $\mathbf{D}_r$ ) is defined, in which the polar coordinate  $r$  of each coordinated atom is varied,  $R_i = r_i - D_r$ . The usual procedure is to obtain the  $D_r$  parameter of each kind of donor

atom from a collective fit of an observable (e.g. energy levels or magnetic properties) for a family of isostructural lanthanide complexes. At the same time, the charge value ( $Z_i$ ) is scanned in order to achieve the minimum deviation between calculated and experimental data, whereas  $\theta_i$  and  $\varphi_i$  remain constant. In this work, we have kept fixed the value of  $D_r$  for the oxygen and nitrogen atoms, 0.98 Å and 1.20 Å, which have been taken from the literature (Chem. Sci., Inorg. Chem.) and offer a better approximation for the relative relation between  $k = 2, 4, 6$ , which is one of the main drawbacks of the point-charge electrostatic model. This strategy allows us to restrict the number of free parameters to 2, i.e. the effective charges of the nitrogen and oxygen atoms,  $Z_i(\text{N}) = 0.05$  and  $Z_i(\text{O}) = 0.161$ , which have been obtained by a two-parameter fit of the  $\chi T$  product of both phases. Here it is worth to mention that these phenomenological parameters used by SIMPRE to predict the spin energy levels and wave functions do not pretend to simulate the actual charge distribution. In the fitting procedures, we define the relative error  $E$  as:

$$E = \frac{1}{n} \sum_{i=1}^n \frac{[\chi_{theo,i} - \chi_{exp,i}]^2}{[\chi_{exp,i}]^2} \quad (4)$$

where  $\chi_{exp}$  and  $\chi_{theo}$  are experimental and theoretical magnetic susceptibility, respectively, and  $n$  is the number of points.

To calculate the magnetic properties, SIMPRE introduces the interaction between the electron spin and an external magnetic field along the  $z$ -direction via a Zeeman term  $\hat{H}_{ZEE}$ :

$$\hat{H}_{ZEE} = g_j \mu_B B_z \cdot \hat{J}_z$$

Where  $g_j$  is the Landé  $g$ -factor for the ground  $J$ -multiplet,  $\mu_B$  is the Bohr magneton,  $B_z$  is the external magnetic field along the  $z$ -direction and  $\hat{J}_z$  is the  $z$ -component of the total electronic angular momentum operator. Once we have the eigenvalues of the system at different magnetic fields or temperatures, one can evaluate the partition function  $Z$ :

$$Z = \sum_n \exp\left(-\frac{E_n}{kT}\right)$$

where  $E_n$  are the eigenvalues of the system,  $T$  is temperature and  $k$  is the Boltzmann constant. Then, the macroscopic thermodynamic properties, such as magnetization and magnetic susceptibility, are calculated by summing the  $N$  microscopic magnetizations weighed by according

to the Boltzmann distribution law, via the following fundamental equations:

$$M = NkT \frac{\partial \ln Z}{\partial H}$$

**Table S12.** Crystal field parameters ( $A_k^q < r^k >$ ; Stevens notation) in  $\text{cm}^{-1}$  obtained for **1a**, **1a\_des** and **1b**.

| <b>k</b> | <b>q</b> | <b>1a</b> | <b>1a_des</b> | <b>1b</b> |
|----------|----------|-----------|---------------|-----------|
| 2        |          | -109.47   | -4.31         | -235.64   |
|          | 0        |           |               |           |
| 2        |          | 536.28    | -174.55       | -23.17    |
|          | 1        |           |               |           |
| 2        | -        | 132.52    | 97.96         | 175.22    |
|          | 1        |           |               |           |
| 2        |          | -9.96     | 443.83        | -232.21   |
|          | 2        |           |               |           |
| 2        | -        | 1.21      | 156.58        | 47.37     |
|          | 2        |           |               |           |
| 4        |          | 53.25     | 177.50        | -23.76    |
|          | 0        |           |               |           |
| 4        |          | 133.83    | 256.23        | 58.08     |
|          | 1        |           |               |           |
| 4        | -        | 126.58    | 58.57         | 411.70    |
|          | 1        |           |               |           |
| 4        |          | 280.14    | -351.37       | -287.91   |
|          | 2        |           |               |           |
| 4        | -        | 54.85     | 319.13        | 55.10     |
|          | 2        |           |               |           |
| 4        |          | 260.99    | 378.95        | 118.07    |
|          | 3        |           |               |           |
| 4        | -        | 218.69    | 36.18         | 90.32     |
|          | 3        |           |               |           |
| 4        |          | -215.45   | -114.76       | -443.98   |
|          | 4        |           |               |           |
| 4        | -        | 35.80     | 302.00        | 224.24    |
|          | 4        |           |               |           |
| 6        |          | 19.33     | -16.06        | 24.75     |
|          | 0        |           |               |           |
| 6        |          | 112.26    | 116.46        | -18.66    |
|          | 1        |           |               |           |
| 6        | -        | 17.69     | 18.09         | 41.02     |
|          | 1        |           |               |           |
| 6        |          | 1.40      | 57.54         | -81.76    |
|          | 2        |           |               |           |
| 6        | -        | 10.26     | 41.34         | 93.90     |
|          | 2        |           |               |           |
| 6        |          | -266.50   | -39.74        | 17.48     |
|          | 3        |           |               |           |
| 6        | -        | 121.33    | 292.07        | 77.70     |
|          | 3        |           |               |           |
| 6        |          | -232.96   | 2.04          | 111.02    |
|          | 4        |           |               |           |
| 6        | -        | 103.40    | 44.61         | 145.96    |
|          | 4        |           |               |           |



|   |   |        |         |         |
|---|---|--------|---------|---------|
| 6 |   | 732.41 | -346.65 | -623.85 |
| 6 | 5 |        |         |         |
| 6 | - | 249.20 | 431.47  | 65.11   |
| 6 | 5 |        |         |         |
| 6 |   | 167.56 | 16.77   | 123.27  |
| 6 | 6 |        |         |         |
| 6 | - | 193.08 | 10.26   | 225.20  |
| 6 | 6 |        |         |         |

**Table S13.** Ground multiplet energy level scheme (Kramers doublets in  $\text{cm}^{-1}$ ) and main  $|M_I\rangle$  contributions to the wave function calculated for **1a** and **1a\_des**. Red numbers in brackets: Main energy values estimated from PL spectrum of **1a\_des** at 77K, assuming a zero-phonon transition wavelength of 1529 nm.

| <b>1a</b>  |                                                                                                                                  | <b>1a_des</b>              |                                                                                                         |
|------------|----------------------------------------------------------------------------------------------------------------------------------|----------------------------|---------------------------------------------------------------------------------------------------------|
| <b>0</b>   | 59.5% $ \pm 13/2\rangle$ + 14.7% $ \pm 5/2\rangle$                                                                               | <b>0</b>                   | 63.7% $ \pm 9/2\rangle$ + 13.5% $ \pm 11/2\rangle$ + 10.8% $ \pm 7/2\rangle$                            |
| <b>39</b>  | 36.6% $ \pm 11/2\rangle$ + 14.0% $ \pm 3/2\rangle$ + 16.3% $ \pm 1/2\rangle$                                                     | <b>42</b><br><b>(29)</b>   | 42.3% $ \pm 7/2\rangle$ + 13.0% $ \pm 9/2\rangle$ + 12.9% $ \pm 13/2\rangle$ + 12.9% $ \pm 11/2\rangle$ |
| <b>94</b>  | 17.4% $ \pm 11/2\rangle$ + 20.6% $ \pm 7/2\rangle$                                                                               | <b>73</b>                  | 53.8% $ \pm 11/2\rangle$ + 11.1% $ \pm 7/2\rangle$                                                      |
| <b>158</b> | 10.6% $ \pm 11/2\rangle$ + 12.8% $ \pm 9/2\rangle$ + 12.1% $ \pm 7/2\rangle$ + 12.2% $ \pm 3/2\rangle$ + 13.1% $ \mp 9/2\rangle$ | <b>135</b>                 | 49.4% $ \pm 5/2\rangle$                                                                                 |
| <b>236</b> | 12.2% $ \pm 13/2\rangle$ + 14.4% $ \pm 9/2\rangle$ + 16.7% $ \pm 3/2\rangle$ + 23.3% $ \pm 1/2\rangle$                           | <b>188</b>                 | 44.8% $ \pm 13/2\rangle$ + 14.5% $ \pm 3/2\rangle$                                                      |
| <b>263</b> | 30.0% $ \pm 15/2\rangle$ + 15.1% $ \pm 9/2\rangle$ + 16.9% $ \pm 5/2\rangle$                                                     | <b>248</b>                 | 31.9% $ \pm 3/2\rangle$ + 22.7% $ \pm 13/2\rangle$                                                      |
| <b>312</b> | 17.2% $ \pm 7/2\rangle$ + 12.3% $ \pm 3/2\rangle$ + 10.7% $ \pm 1/2\rangle$ + 12.3% $ \mp 3/2\rangle$                            | <b>312</b>                 | 79.4% $ \pm 15/2\rangle$                                                                                |
| <b>350</b> | 22.0% $ \pm 15/2\rangle$ + 26.8% $ \pm 7/2\rangle$ + 11.2% $ \pm 5/2\rangle$                                                     | <b>390</b><br><b>(349)</b> | 37.8% $ \pm 1/2\rangle$ + 22.8% $ \mp 1/2\rangle$ + 18.6% $ \mp 3/2\rangle$                             |

**Table S14.** Ground multiplet energy level scheme (Kramers doublets in  $\text{cm}^{-1}$ ) and main  $|M_I\rangle$  contributions to the wave function calculated for **1b**. Red numbers in brackets: Main energy values estimated from the PL spectrum of **1b** at 77K, assuming a zero-phonon transition wavelength of 1524 nm.

| <b>1b</b>                |                                                                                                          |
|--------------------------|----------------------------------------------------------------------------------------------------------|
| <b>0</b>                 | 59.2% $ \pm 13/2\rangle$                                                                                 |
| <b>32</b><br><b>(36)</b> | 33.4% $ \pm 11/2\rangle$ + 29.7% $ \pm 15/2\rangle$ + 12.3% $ \mp 13/2\rangle$ + 10.4% $ \mp 1/2\rangle$ |
| <b>89</b>                | 16.9% $ \pm 5/2\rangle$ + 16.4% $ \pm 3/2\rangle$ + 13.1% $ \mp 3/2\rangle$ + 11.6% $ \pm 1/2\rangle$    |
| <b>127</b>               | 22.5% $ \pm 15/2\rangle$ + 19.7% $ \pm 0.50\rangle$ + 17.4% $ \mp 3/2\rangle$ + 13.4% $ \mp 1/2\rangle$  |

|                            |                                                                                                                                |
|----------------------------|--------------------------------------------------------------------------------------------------------------------------------|
| <b>189</b>                 | $22.0\%  \pm 11/2\rangle + 16.7\%  \pm 9/2\rangle + 12.0\%  \pm 5/2\rangle + 11.6\%  \pm 7/2\rangle + 11.3\%  \pm 15/2\rangle$ |
| <b>230</b>                 | $22.3\%  \pm 9/2\rangle + 10.8\%  \pm 7/2\rangle + 12.2\%  \mp 15/2\rangle$                                                    |
| <b>314</b>                 | $24.8\%  \pm 9/2\rangle + 12.0\%  \mp 7/2\rangle + 10.7\%  \mp 5/2\rangle + 10.6\%  \pm 3/2\rangle$                            |
| <b>354</b><br><b>(353)</b> | $33.6\%  \pm 7/2\rangle + 27.8\%  \mp 5/2\rangle + 10.2\%  \pm 3/2\rangle$                                                     |

## 7. Photoluminescence Measurements

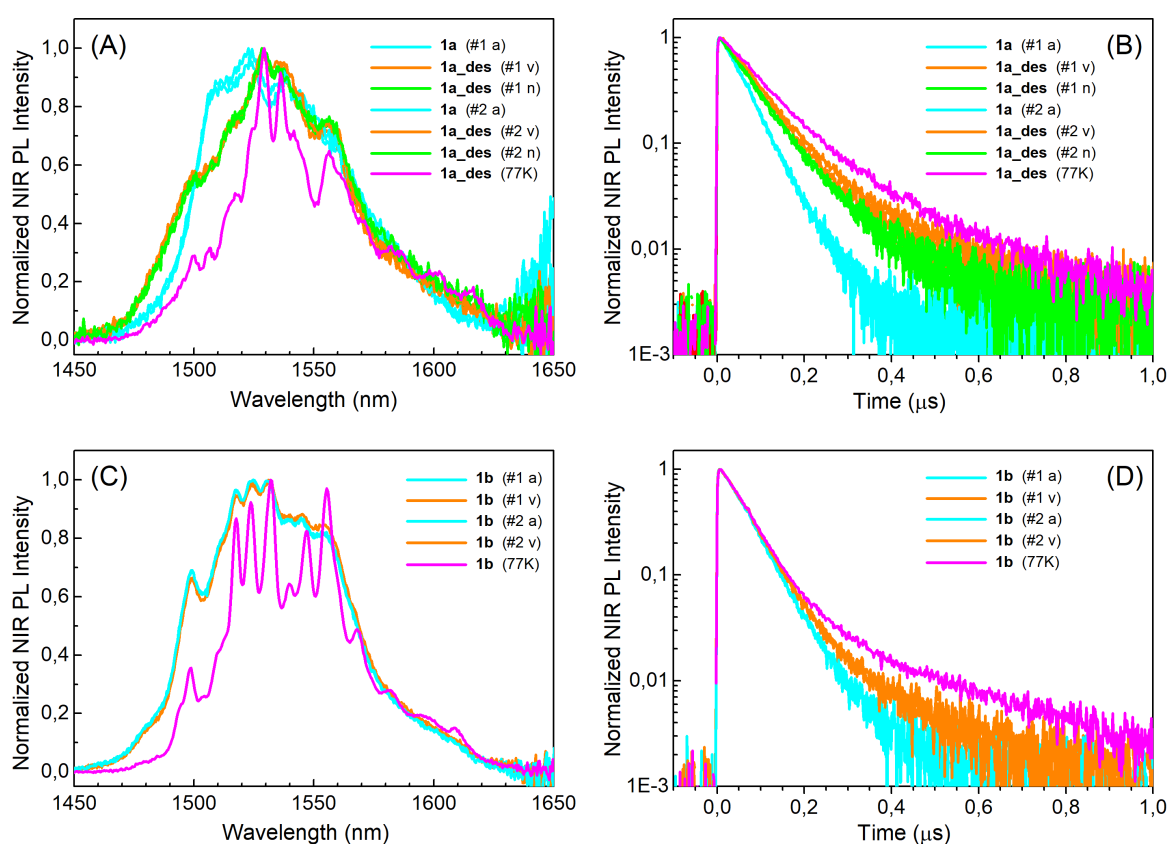

**Figure S21.** Demonstration of reversible  $\text{Er}^{\text{III}}$ -centred NIR PL properties in hydration/dehydration cycles. #1(2): First(second) measurement in air (a), under vacuum (v) and  $\text{N}_2$  atmosphere (n). (A) NIR PL spectra of phase **1a** (in air) and **1a\_des** (under vacuum and  $\text{N}_2$ ). (B) NIR PL decay transients. (C,D) Same as (A,B) but for **1b**. All spectra and decay transient are normalized to their peak values for better clarity. Absolute PL intensities were reproduced within 5-10% after each cycle. At room temperature, all phases displayed the same integrated PL intensity within 10%. Cooling to 77K produced less than a factor of two increase in integrated PL intensity in both **1a\_des** and **1b**.

## 8. References

- 1 W. Gauß, H. Heitzer and S. Petersen, *Justus Liebigs Ann. Chem.*, 1973, **764**, 131–144.
- 2 J. J. Baldoví, S. Cardona-Serra, J. M. Clemente-Juan, E. Coronado, A. Gaita-Ariño and A. Palií, *J. Comput. Chem.*, 2013, **34**, 1961–1967.
- 3 J. J. Baldoví, J. J. Borrás-Almenar, J. M. Clemente-Juan, E. Coronado and A. Gaita-Ariño, *Dalt. Trans.*, 2012, **41**, 13705–13710.
- 4 G. M. Sheldrick, *Acta Crystallogr. Sect. A Found. Crystallogr.*, 2015, **71**, 3–8.
- 5 G. M. Sheldrick, *Acta Crystallogr. Sect. C Struct. Chem.*, 2015, **71**, 3–8.
- 6 O. V. Dolomanov, L. J. Bourhis, R. J. Gildea, J. A. K. Howard and H. Puschmann, *J. Appl. Crystallogr.*, 2009, **42**, 339–341.
- 7 M. Llunell, D. Casanova, J. Cirera, P. Alemany and S. Alvarez, *Univ. Barcelona Barcelona, Spain*.
- 8 F. M. A. Kerim, H. F. Aly and A. El-Agramy, *Proc. Indian Acad. Sci. - Sect. A*, 1977, **85**, 559–566.
- 9 M. K. Trivedi, R. M. Tallapragada, A. Branton, D. Trivedi, G. Nayak, R. K. Mishra and S. Jana, *J. Mol. Pharm. Org. Process Res.*, 2015, **03**, 1–6.
- 10 O. Roubeau, B. Agricole, R. Cle and S. Ravaine, *J. Phys. Chem. B*, 2004, **108**, 15110–15116.
- 11 Q. Deng, C. Tian, Z. Luo, Y. Zhou, B. Gou, H. Liu, Y. Ding and R. Yang, *Chem. Commun.*, 2020, **56**, 12234–12237.
- 12 C. Rudowicz, *J. Phys. C Solid State Phys.*, 1985, **18**, 3837.
- 13 C. Rudowicz and C. Y. Chung, *J. Phys. Condens. Matter*, 2004, **16**, 5825–5847.
- 14 I. D. Ryabov, *J. Magn. Reson.*, 1999, **140**, 141–145.
- 15 K. W. H. Stevens, *Proc. Phys. Soc. Sect. A*, 1952, **65**, 209–215.
- 16 S. Edvardsson and M. Klintonberg, *J. Alloys Compd.*, 1998, **275–277**, 230–233.
